# Supplementary material for: Minimum physical activities protective against Alzheimer’s disease in late life: a systematic review
Source: publisher site journal article supplement (doi:10.1515/jom-2025-0065), 2025-07-15
Supplement: Supplementary file 1 [file j_jom-2025-0065_suppl_001.docx]

**Appendix: Key Word Search Strategy for MEDLINE and CINHAL**

Pubmed via MEDLINE

("Alzheimer Disease"Mesh OR “Alzheimer’s Disease”Text word OR “Alzheimer Disease”Text word  OR "Cognitive Dysfunction"Mesh OR “Cognitive Impairment”Text word OR “Cognitive Dysfunction”Text word OR "Dementia"Mesh OR "Dementia"Text word) AND ("Exercise"Mesh OR "Exercise"Text word OR "Physical Activity"Text word)

*Filters Applied: Clinical Study, Clinical Trial, Comparative Study, Controlled Clinical Trial, Observational Study, Randomized Controlled Trial*

CINHAL

(MM "Alzheimer's Disease" OR MM "Delirium, Dementia, Amnestic, Cognitive Disorders" OR TI "Alzheimer's" OR TI "Alzheimer" OR TI "Dementia" OR TI “Cognitive Dysfunction” OR TI “Cognitive Impairment”) AND (MM "Exercise" OR MM "Physical Activity" OR TI "Exercise" OR TI "Physical Activity
